# Supplementary material for: Prognostic cellular senescence-related lncRNAs patterns to predict clinical outcome and immune response in colon cancer
Source: Front Immunol. 2024 Sep 2;15:1450135. doi: 10.3389/fimmu.2024.1450135 (PMC11443174; doi:10.3389/fimmu.2024.1450135)
Supplement: Supplementary Table 1 — The clinical information of the entire cohort. [file Table1.xlsx]

## Sheet: 1
	Alive	Death	Overall
	(N=338)	(N=94)	(N=432)
factor(Gender)
female	158 (46.7%)	42 (44.7%)	200 (46.3%)
male	180 (53.3%)	52 (55.3%)	232 (53.7%)
factor(Age)
<=60	112 (33.1%)	24 (25.5%)	136 (31.5%)
>60	226 (66.9%)	70 (74.5%)	296 (68.5%)
factor(stage)
i	69 (20.4%)	4 (4.3%)	73 (16.9%)
ii	140 (41.4%)	26 (27.7%)	166 (38.4%)
iii	93 (27.5%)	29 (30.9%)	122 (28.2%)
iv	30 (8.9%)	30 (31.9%)	60 (13.9%)
Missing	6 (1.8%)	5 (5.3%)	11 (2.5%)
factor(T)
T1	9 (2.7%)	2 (2.1%)	11 (2.5%)
T2	71 (21.0%)	4 (4.3%)	75 (17.4%)
T3	229 (67.8%)	67 (71.3%)	296 (68.5%)
T4	28 (8.3%)	21 (22.3%)	49 (11.3%)
Missing	1 (0.3%)	0 (0%)	1 (0.2%)
factor(N)
N0	219 (64.8%)	35 (37.2%)	254 (58.8%)
N1	76 (22.5%)	24 (25.5%)	100 (23.1%)
N2	43 (12.7%)	35 (37.2%)	78 (18.1%)
factor(M)
M0	269 (79.6%)	49 (52.1%)	318 (73.6%)
M1	30 (8.9%)	30 (31.9%)	60 (13.9%)
MX	35 (10.4%)	12 (12.8%)	47 (10.9%)
Missing	4 (1.2%)	3 (3.2%)	7 (1.6%)
factor(MSI)
	8 (2.4%)	0 (0%)	8 (1.9%)
Indeterminate	3 (0.9%)	0 (0%)	3 (0.7%)
MSI-H	56 (16.6%)	16 (17.0%)	72 (16.7%)
MSI-L	53 (15.7%)	19 (20.2%)	72 (16.7%)
MSS	218 (64.5%)	59 (62.8%)	277 (64.1%)
