# Supplementary material for: Prognostic cellular senescence-related lncRNAs patterns to predict clinical outcome and immune response in colon cancer
Source: Front Immunol. 2024 Sep 2;15:1450135. doi: 10.3389/fimmu.2024.1450135 (PMC11443174; doi:10.3389/fimmu.2024.1450135)
Supplement: Supplementary Table 2 — The sequences of MYSOLID-ASOs. [file Table2.xlsx]

## Sheet: Sheet1
		Gene	Antisense (5'-3')
		MYOSLID-ASO-1	G*U*C*U*A*T*T*C*T*G*C*T*G*G*A*A*C*C*A*G
		MYOSLID-ASO-2	A*C*U*C*U*A*C*A*G*A*G*A*T*T*C*A*A*C*A*G
		MYOSLID-ASO-3	U*G*U*A*C*C*A*C*A*C*T*A*T*G*G*A*C*U*A*A
