# Supplementary material for: Prognostic cellular senescence-related lncRNAs patterns to predict clinical outcome and immune response in colon cancer
Source: Front Immunol. 2024 Sep 2;15:1450135. doi: 10.3389/fimmu.2024.1450135 (PMC11443174; doi:10.3389/fimmu.2024.1450135)
Supplement: Supplementary Table 3 — The primer sequences used for q-PCR. [file Table3.xlsx]

## Sheet: Sheet1
Gene	Primer sequences (5' to 3')
MYOSLID-F	CGCTACATCCACTCTCACCTG
MYOSLID-R	CCACATTCAGATGCAGGCAA
GAPDH-F	TGCAAATCCCATCACCATCT
GAPDH-R	TGGACTCCACGACGTACTCA
LaminB1_F	AAGCATGAAACGCGCTTGG
LaminB1_R	AGTTTGGCATGGTAAGTCTGC
Ki67-F	ACGCCTGGTTACTATCAAAAGG
Ki67-R	CAGACCCATTTACTTGTGTTGGA
MCM2-F	CAGCAACAAGGAGGAGGAGG
MCM2-R	ATCTGGTTGAGCTTCGGGTG
p16-F	CAAGATCACGCAAAAACCTCTG
p16-R	CGACCCTATACACGTTGAACTG
