# Supplementary material for: Prognostic cellular senescence-related lncRNAs patterns to predict clinical outcome and immune response in colon cancer
Source: Front Immunol. 2024 Sep 2;15:1450135. doi: 10.3389/fimmu.2024.1450135 (PMC11443174; doi:10.3389/fimmu.2024.1450135)
Supplement: Supplementary Table 4 — The information of 572 DEGs between normal and tumor tissues. [file Table4.xlsx]

## Sheet: TableS1
Gene	logFC	AveExpr	t	P.Value	adj.P.Val	B	change
CLEC3B	-0.757556	5.52513	-51.7968	1.16e-202	1.88e-198	453.057	DOWN
CA7	-1.38358	5.17095	-44.9609	1.92e-177	1.56e-173	394.748	DOWN
BEST4	-1.24173	5.23177	-43.1223	2.96e-170	1.61e-166	378.456	DOWN
GCNT2	-0.848733	5.34445	-40.7323	1.21e-160	4.94e-157	356.529	DOWN
SLC25A34	-0.88272	5.25047	-40.4926	1.16e-159	3.78e-156	354.042	DOWN
SPIB	-1.06309	5.32219	-39.0663	9.27e-154	2.52e-150	340.836	DOWN
LYVE1	-0.847475	5.43954	-37.0687	2.63e-145	6.11e-142	321.55	DOWN
ABCA8	-1.21735	5.10594	-36.8285	2.82e-144	5.75e-141	318.795	DOWN
ABCG2	-0.858531	5.48949	-36.6817	1.21e-143	2.19e-140	317.777	DOWN
FAM107A	-0.681459	5.50511	-36.3329	3.87e-142	6.3e-139	314.289	DOWN
C2orf88	-0.608199	5.85151	-35.4246	3.46e-138	5.12e-135	305.315	DOWN
USP2	-0.763163	5.48071	-34.8297	1.41e-135	1.92e-132	299.234	DOWN
GLP2R	-1.04263	5.01746	-33.7925	5.61e-131	7.02e-128	288.033	DOWN
BMP3	-1.50157	4.93486	-33.7556	8.19e-131	9.53e-128	287.742	DOWN
LIFR	-0.681846	5.50044	-33.6955	1.52e-130	1.65e-127	287.687	DOWN
SCN9A	-0.916488	5.19858	-32.7653	2.28e-126	2.21e-123	277.86	DOWN
PKIB	-0.676156	5.83327	-31.7283	1.16e-121	9.46e-119	267.306	DOWN
SFRP1	-1.21967	5.14139	-31.7451	9.74e-122	8.35e-119	267.295	DOWN
SCARA5	-1.0719	5.42454	-30.9311	5.25e-118	4.07e-115	258.917	DOWN
LRRN2	-0.745339	5.50625	-30.6824	7.35e-117	5.44e-114	256.287	DOWN
GSTM5	-0.692643	5.18588	-29.7791	1.13e-112	7.68e-110	246.218	DOWN
TMEM220	-0.586818	5.53121	-29.036	3.35e-109	2.02e-106	238.686	DOWN
TNXB	-0.659061	5.73486	-28.9783	6.25e-109	3.51e-106	238.056	DOWN
CA1	-1.83489	5.05702	-28.9382	9.65e-109	5.24e-106	237.482	DOWN
SULT1A2	-0.891265	5.25915	-28.8763	1.88e-108	9.9e-106	236.869	DOWN
TMEM72	-1.24546	4.96516	-28.7756	5.6e-108	2.85e-105	235.563	DOWN
SLC51B	-0.797985	5.60056	-28.7312	9.05e-108	4.47e-105	235.41	DOWN
ADH1B	-1.2651	5.2773	-28.3714	4.47e-106	2.14e-103	231.497	DOWN
PRKG2	-0.925427	5.07513	-28.2044	2.74e-105	1.28e-102	229.402	DOWN
STMN2	-0.934202	5.27373	-28.1321	6.03e-105	2.73e-102	228.879	DOWN
CHGA	-1.35674	5.34721	-27.9957	2.66e-104	1.17e-101	227.444	DOWN
OGN	-1.32022	4.96483	-27.8005	2.23e-103	9.33e-101	225.089	DOWN
MT1M	-1.03848	5.3278	-27.7541	3.7e-103	1.51e-100	224.807	DOWN
SLC4A4	-0.910412	5.73413	-27.6521	1.13e-102	4.27e-100	223.652	DOWN
AFF3	-0.749782	5.16454	-27.6602	1.03e-102	4.06e-100	223.502	DOWN
GREM2	-0.962615	5.38214	-27.5618	3.03e-102	1.12e-99	222.722	DOWN
ADCY5	-0.586156	5.62239	-27.5329	4.15e-102	1.47e-99	222.408	DOWN
ANO5	-1.14252	4.92218	-27.4822	7.22e-102	2.5e-99	221.466	DOWN
GUCA2A	-0.989485	5.76345	-27.2587	8.34e-101	2.77e-98	219.336	DOWN
CLCA4	-1.40097	5.47959	-26.7226	2.99e-98	8.4e-96	213.541	DOWN
ALPI	-1.09797	5.20329	-26.6013	1.14e-97	3.03e-95	212.179	DOWN
SCNN1B	-0.944648	5.54865	-26.5648	1.7e-97	4.46e-95	211.805	DOWN
PDZD4	-0.769963	5.13024	-26.1161	2.39e-95	6.07e-93	206.626	DOWN
CD177	-1.15098	5.54252	-26.087	3.29e-95	8.24e-93	206.542	DOWN
AQP8	-1.57079	5.21597	-26.0052	8.12e-95	1.99e-92	205.656	DOWN
CA4	-1.42647	5.36784	-25.9762	1.12e-94	2.64e-92	205.349	DOWN
GNAO1	-0.617356	5.52101	-25.802	7.67e-94	1.73e-91	203.43	DOWN
SLC51A	-0.585062	5.64805	-25.5988	7.26e-93	1.62e-90	201.167	DOWN
LILRB5	-0.630215	5.49386	-25.5798	8.96e-93	1.97e-90	200.979	DOWN
MYOM1	-0.596257	5.39057	-25.1597	9.44e-91	1.92e-88	196.308	DOWN
WSCD1	-0.599149	5.71525	-24.9525	9.41e-90	1.82e-87	193.985	DOWN
PYGM	-0.749678	5.09485	-24.805	4.85e-89	8.87e-87	192.133	DOWN
TMEM236	-0.712372	5.74603	-24.6708	2.15e-88	3.73e-86	190.828	DOWN
GDPD2	-0.782423	5.39109	-24.398	4.48e-87	7.53e-85	187.898	DOWN
CHGB	-1.06754	5.02703	-24.3784	5.58e-87	9.27e-85	187.56	DOWN
MS4A12	-1.55064	5.15813	-24.2589	2.11e-86	3.37e-84	186.345	DOWN
TRPM6	-0.796935	5.65653	-24.1963	4.24e-86	6.57e-84	185.586	DOWN
DCLK1	-0.731575	5.23469	-24.1782	5.19e-86	7.97e-84	185.393	DOWN
DPT	-0.697177	5.68448	-24.1143	1.06e-85	1.61e-83	184.671	DOWN
BEST2	-1.43024	4.92418	-24.0912	1.37e-85	2.06e-83	184.369	DOWN
CWH43	-1.43368	4.9184	-24.0775	1.59e-85	2.38e-83	184.219	DOWN
C1QTNF7	-0.781514	5.05292	-23.9105	1.02e-84	1.49e-82	182.231	DOWN
BMX	-0.617701	5.2657	-23.7117	9.41e-84	1.33e-81	180.168	DOWN
TMEM82	-0.925773	5.22854	-23.5975	3.36e-83	4.6e-81	178.991	DOWN
ZG16	-1.30296	5.63948	-23.6042	3.12e-83	4.31e-81	178.965	DOWN
ARHGAP20	-0.763989	5.01297	-23.5203	7.96e-83	1.08e-80	177.796	DOWN
MMRN1	-0.846144	5.3296	-23.4883	1.14e-82	1.53e-80	177.791	DOWN
C11orf86	-1.26486	5.07064	-23.4815	1.23e-82	1.64e-80	177.682	DOWN
EPHA7	-0.910064	5.08019	-23.4576	1.6e-82	2.11e-80	177.347	DOWN
C7	-0.76853	5.63568	-23.4393	1.97e-82	2.54e-80	177.167	DOWN
TMEM253	-0.70077	5.22374	-23.4121	2.67e-82	3.36e-80	176.849	DOWN
SSTR2	-0.596029	5.16629	-23.4281	2.23e-82	2.86e-80	176.838	DOWN
B4GALNT2	-1.40574	5.19539	-23.4024	2.97e-82	3.72e-80	176.834	DOWN
CILP	-0.846088	5.35	-23.3396	5.99e-82	7.39e-80	176.136	DOWN
CHAD	-0.755789	5.12705	-23.2768	1.21e-81	1.47e-79	175.265	DOWN
PTGDR2	-0.652547	5.31665	-23.1372	5.74e-81	6.88e-79	173.84	DOWN
MPZ	-0.604081	5.2327	-23.034	1.82e-80	2.07e-78	172.6	DOWN
CA2	-0.654653	6.17813	-23.0441	1.63e-80	1.88e-78	172.457	DOWN
UGT1A10	-0.820479	5.50054	-22.9724	3.62e-80	4.07e-78	172.014	DOWN
LDB3	-0.804049	5.08487	-22.918	6.65e-80	7.42e-78	171.32	DOWN
EYA2	-0.728763	5.41226	-22.8095	2.24e-79	2.46e-77	170.233	DOWN
GFRA1	-0.711999	5.41273	-22.7834	3e-79	3.27e-77	169.942	DOWN
CLEC10A	-0.675834	5.42908	-22.7204	6.06e-79	6.57e-77	169.243	DOWN
ABCA6	-0.723751	5.07104	-22.6417	1.46e-78	1.55e-76	168.143	DOWN
FSIP2	-0.644209	5.43799	-22.5261	5.31e-78	5.58e-76	167.077	DOWN
DNASE1L3	-0.974727	5.26401	-22.5072	6.56e-78	6.85e-76	166.871	DOWN
B3GALT1	-1.18422	4.94904	-22.469	1.01e-77	1.04e-75	166.348	DOWN
ABCC13	-1.0295	4.90809	-22.2961	6.95e-77	7.03e-75	164.303	DOWN
CP	-0.78067	5.29401	-22.2735	8.95e-77	8.94e-75	164.266	DOWN
TMEM35	-0.88794	5.04084	-22.2616	1.02e-76	1e-74	164.028	DOWN
ACKR2	-0.693697	5.05953	-22.2197	1.63e-76	1.59e-74	163.384	DOWN
CNTN3	-0.992871	4.94298	-22.2053	1.92e-76	1.86e-74	163.338	DOWN
DPF3	-0.610943	5.30209	-22.0689	8.81e-76	8.39e-74	161.955	DOWN
PTGDR	-0.887866	5.14445	-22.0145	1.62e-75	1.52e-73	161.349	DOWN
RUNDC3B	-0.611043	5.29152	-22.0124	1.66e-75	1.54e-73	161.321	DOWN
VIP	-0.983211	5.35431	-21.9652	2.81e-75	2.59e-73	160.818	DOWN
TNFRSF17	-1.01701	5.02064	-21.968	2.72e-75	2.52e-73	160.787	DOWN
CHL1	-0.634376	5.43895	-21.879	7.37e-75	6.7e-73	159.869	DOWN
GALNT16	-0.805974	5.00627	-21.6902	6.08e-74	5.32e-72	157.566	DOWN
ADTRP	-0.667922	5.83432	-21.6528	9.23e-74	8e-72	157.146	DOWN
SLC17A4	-0.726852	5.56368	-21.507	4.71e-73	4.06e-71	155.661	DOWN
C1orf95	-0.98594	5.02737	-21.4577	8.17e-73	6.93e-71	155.132	DOWN
ADAMTSL3	-0.678667	5.32002	-21.1972	1.5e-71	1.21e-69	152.289	DOWN
MADCAM1	-0.702138	5.15033	-21.2022	1.42e-71	1.15e-69	152.241	DOWN
CCDC152	-0.651603	5.16973	-21.0843	5.29e-71	4.16e-69	150.94	DOWN
HSD17B2	-0.605992	5.90803	-21.0779	5.68e-71	4.45e-69	150.696	DOWN
MT1H	-0.87978	5.37214	-20.9506	2.35e-70	1.78e-68	149.526	DOWN
CHRDL1	-0.813139	5.50642	-20.7935	1.36e-69	1e-67	147.725	DOWN
UGT2A3	-0.918218	5.57764	-20.6815	4.74e-69	3.35e-67	146.433	DOWN
PEG3	-0.622603	5.17859	-20.6565	6.26e-69	4.39e-67	146.199	DOWN
EDN3	-0.751993	5.64655	-20.5443	2.19e-68	1.49e-66	144.892	DOWN
RELN	-0.887519	5.01817	-20.478	4.58e-68	3.07e-66	144.216	DOWN
BTNL8	-0.668801	5.75634	-20.3343	2.27e-67	1.49e-65	142.505	DOWN
LPHN3	-0.651728	5.3194	-20.2935	3.57e-67	2.32e-65	142.257	DOWN
IGSF10	-0.858107	4.99503	-20.2335	6.97e-67	4.45e-65	141.483	DOWN
DHRS9	-0.748829	5.79337	-20.1738	1.35e-66	8.62e-65	140.683	DOWN
HSPB6	-0.642252	5.65396	-20.0359	6.28e-66	3.91e-64	139.255	DOWN
LMO3	-0.726106	5.24511	-20.01	8.38e-66	5.15e-64	139.117	DOWN
IGLV7-43	-0.95448	5.28035	-19.9593	1.47e-65	8.95e-64	138.541	DOWN
HRASLS2	-0.868534	5.07289	-19.9181	2.33e-65	1.4e-63	138.055	DOWN
SGCA	-0.742445	5.10348	-19.882	3.48e-65	2.08e-63	137.638	DOWN
ATP1B2	-0.649864	5.01216	-19.811	7.65e-65	4.5e-63	136.677	DOWN
IGHV2-5	-1.11901	4.85545	-19.7314	1.85e-64	1.06e-62	135.941	DOWN
AC073283.4	-0.621971	5.14732	-19.631	5.64e-64	3.14e-62	134.837	DOWN
CCL14	-0.655484	4.97207	-19.6144	6.78e-64	3.76e-62	134.463	DOWN
FAM189A2	-0.71839	5.02381	-19.545	1.47e-63	7.95e-62	133.821	DOWN
KLB	-0.670476	4.97635	-19.4524	4.09e-63	2.18e-61	132.684	DOWN
IGHV3-72	-0.88365	5.40151	-19.3545	1.21e-62	6.35e-61	131.816	DOWN
ADH1C	-0.805269	5.89327	-19.2941	2.36e-62	1.23e-60	130.849	DOWN
TMOD1	-0.664865	5.20178	-19.1181	1.66e-61	8.45e-60	129.262	DOWN
IGLV5-45	-1.06639	5.05526	-19.0621	3.07e-61	1.55e-59	128.66	DOWN
RP11-284N8.3	-0.756366	4.99757	-18.9864	7.1e-61	3.55e-59	127.711	DOWN
CORO2B	-0.642197	5.13254	-18.9064	1.72e-60	8.41e-59	126.886	DOWN
HAND2	-0.920844	5.07793	-18.8445	3.4e-60	1.65e-58	126.27	DOWN
TPSG1	-0.704541	5.50605	-18.7395	1.08e-59	5.1e-58	125.029	DOWN
FER1L6	-0.91452	5.28627	-18.6358	3.39e-59	1.57e-57	123.953	DOWN
ATP13A4	-0.873462	4.90698	-18.4846	1.79e-58	7.98e-57	122.2	DOWN
GRIK5	-0.699898	5.03167	-18.4111	4.01e-58	1.75e-56	121.433	DOWN
LGALS9C	-0.756249	5.36902	-18.3374	9.02e-58	3.86e-56	120.676	DOWN
MFAP5	-0.608994	5.61899	-18.3334	9.42e-58	4.03e-56	120.512	DOWN
FABP2	-0.77262	5.56837	-18.2892	1.53e-57	6.42e-56	120.026	DOWN
SHISA3	-0.796589	5.00088	-18.0644	1.8e-56	7.33e-55	117.685	DOWN
IGKV6-21	-1.08225	4.85264	-18.0382	2.39e-56	9.67e-55	117.396	DOWN
CHST5	-0.823157	5.32534	-17.9627	5.47e-56	2.2e-54	116.597	DOWN
KIAA1644	-0.585824	5.35256	-17.9522	6.14e-56	2.45e-54	116.52	DOWN
TMEM255A	-0.708293	4.97415	-17.8605	1.67e-55	6.5e-54	115.402	DOWN
IGLV7-46	-0.832629	5.44448	-17.8346	2.22e-55	8.55e-54	115.136	DOWN
IGKV1OR2-108	-0.982953	4.89525	-17.7783	4.1e-55	1.56e-53	114.577	DOWN
ASPG	-0.834171	5.08934	-17.7729	4.35e-55	1.65e-53	114.57	DOWN
KIF5A	-0.698489	5.10297	-17.7442	5.94e-55	2.24e-53	114.25	DOWN
IGHV3-13	-0.986473	5.06058	-17.7159	8.09e-55	3.03e-53	113.966	DOWN
CLDN11	-0.594764	5.16975	-17.6976	9.88e-55	3.68e-53	113.741	DOWN
IGLV2-8	-0.742941	5.64428	-17.6629	1.44e-54	5.36e-53	113.153	DOWN
PRKAA2	-0.933457	4.9524	-17.5636	4.25e-54	1.54e-52	112.289	DOWN
TRPV3	-0.693944	5.17095	-17.4276	1.86e-53	6.66e-52	110.847	DOWN
TM6SF2	-0.747331	4.96142	-17.3816	3.07e-53	1.08e-51	110.25	DOWN
LYPD8	-0.74717	5.92849	-17.4042	2.4e-53	8.53e-52	110.136	DOWN
TACR2	-0.602534	5.43316	-17.311	6.61e-53	2.3e-51	109.528	DOWN
AKR1B10	-0.664727	5.84535	-17.3397	4.84e-53	1.69e-51	109.517	DOWN
NPY1R	-0.834279	5.01571	-17.2302	1.59e-52	5.44e-51	108.7	DOWN
TRIM40	-0.655258	5.29817	-17.1998	2.21e-52	7.54e-51	108.387	DOWN
CCL13	-0.890229	5.12631	-17.1444	4.02e-52	1.36e-50	107.798	DOWN
B3GNT6	-0.99607	5.42761	-17.152	3.7e-52	1.25e-50	107.728	DOWN
IGLV4-60	-1.19396	4.7978	-17.1359	4.4e-52	1.48e-50	107.657	DOWN
FAM189A1	-0.836757	5.2757	-17.1199	5.24e-52	1.75e-50	107.492	DOWN
IGKV2-24	-0.807022	5.44574	-17.1222	5.1e-52	1.71e-50	107.431	DOWN
PLIN4	-0.738208	5.35993	-17.1166	5.43e-52	1.81e-50	107.425	DOWN
IGLV2-18	-0.979138	5.07189	-17.0644	9.53e-52	3.14e-50	106.941	DOWN
ASXL3	-0.852739	4.91053	-17.0653	9.44e-52	3.11e-50	106.873	DOWN
CALB2	-0.824185	5.20595	-17.0228	1.49e-51	4.89e-50	106.478	DOWN
IGHV3-74	-0.686674	5.75528	-16.9145	4.81e-51	1.54e-49	104.995	DOWN
HEPACAM2	-0.781503	5.67527	-16.8606	8.59e-51	2.72e-49	104.458	DOWN
MS4A2	-0.706809	5.04481	-16.8172	1.37e-50	4.27e-49	104.258	DOWN
CREB3L3	-0.907013	4.94471	-16.7434	3.03e-50	9.3e-49	103.472	DOWN
CCR2	-0.589525	5.31493	-16.7192	3.93e-50	1.19e-48	103.239	DOWN
CHP2	-0.832239	5.8366	-16.6462	8.62e-50	2.59e-48	102.023	DOWN
CHRNA3	-0.613933	5.25099	-16.57	1.95e-49	5.8e-48	101.654	DOWN
IGKV3D-20	-0.84305	5.24055	-16.5298	3e-49	8.86e-48	101.188	DOWN
IGLV1-36	-1.0167	4.8717	-16.4819	5.01e-49	1.47e-47	100.683	DOWN
COL4A6	-0.839956	4.95544	-16.4736	5.48e-49	1.6e-47	100.591	DOWN
MASP1	-0.763457	5.24833	-16.4584	6.45e-49	1.87e-47	100.441	DOWN
IGKV1-27	-0.734418	5.52254	-16.4195	9.77e-49	2.8e-47	99.8623	DOWN
OSR1	-0.835336	4.95448	-16.3656	1.74e-48	4.91e-47	99.457	DOWN
BMP5	-0.895241	5.13901	-16.3344	2.43e-48	6.81e-47	99.1431	DOWN
TRHDE	-0.718961	5.19016	-16.2536	5.75e-48	1.58e-46	98.2955	DOWN
ACKR1	-0.608244	5.60748	-16.1816	1.24e-47	3.35e-46	97.3066	DOWN
SI	-0.914318	5.49092	-16.0788	3.69e-47	9.72e-46	96.2285	DOWN
CCL19	-0.708816	5.29536	-16.0502	5e-47	1.31e-45	96.1122	DOWN
CCL8	-0.815611	5.0862	-16.0057	8.02e-47	2.08e-45	95.6826	DOWN
KIAA0125	-0.802936	5.08048	-15.9902	9.45e-47	2.45e-45	95.5191	DOWN
IGLV4-69	-0.763228	5.58504	-16.0073	7.88e-47	2.05e-45	95.4348	DOWN
CTD-3157E16.1	-0.598499	5.00375	-15.9437	1.55e-46	3.98e-45	94.9565	DOWN
PLIN1	-0.694933	5.00034	-15.8384	4.72e-46	1.18e-44	93.8902	DOWN
IGKV1-16	-0.690619	5.59945	-15.7539	1.15e-45	2.87e-44	92.7698	DOWN
MB	-0.67731	5.37727	-15.7188	1.67e-45	4.13e-44	92.5899	DOWN
IGHV1-2	-0.738499	5.57365	-15.7186	1.67e-45	4.13e-44	92.3982	DOWN
IGHV1-58	-1.01463	4.90058	-15.6852	2.38e-45	5.84e-44	92.3082	DOWN
IGHV3-49	-0.712304	5.60947	-15.6264	4.42e-45	1.06e-43	91.4156	DOWN
VSIG2	-0.695401	5.864	-15.6052	5.52e-45	1.32e-43	90.9988	DOWN
IGHV3-66	-0.906262	5.0591	-15.5199	1.35e-44	3.16e-43	90.5929	DOWN
MS4A1	-0.865329	5.05868	-15.435	3.3e-44	7.57e-43	89.7092	DOWN
IGKV1-17	-0.712292	5.57529	-15.4502	2.81e-44	6.48e-43	89.5991	DOWN
IGHV3-73	-0.766607	5.40156	-15.2983	1.38e-43	3.08e-42	88.1402	DOWN
IGLV3-1	-0.657469	5.66187	-15.2398	2.54e-43	5.62e-42	87.3474	DOWN
IGKV1-8	-0.882971	5.00711	-15.1795	4.77e-43	1.03e-41	87.0629	DOWN
KCNG1	-0.703667	5.10862	-15.1495	6.52e-43	1.4e-41	86.7533	DOWN
IGLV3-9	-0.856542	5.2366	-15.1386	7.31e-43	1.56e-41	86.5692	DOWN
IGKV3D-11	-0.925839	4.9032	-15.0967	1.13e-42	2.38e-41	86.1945	DOWN
IGHV3-11	-0.676753	5.67671	-15.0003	3.07e-42	6.36e-41	84.8463	DOWN
IGKV1-9	-0.660724	5.6903	-14.9816	3.73e-42	7.7e-41	84.6484	DOWN
IGHV3-53	-0.77519	5.37762	-14.9429	5.57e-42	1.14e-40	84.4809	DOWN
SLC26A3	-0.803196	6.17021	-14.981	3.76e-42	7.75e-41	84.2134	DOWN
RP1-278O22.1	-0.802174	4.94468	-14.884	1.03e-41	2.05e-40	84.0037	DOWN
IGHV3-21	-0.642326	5.69097	-14.9186	7.17e-42	1.46e-40	83.9995	DOWN
CR2	-0.817167	5.17815	-14.8797	1.07e-41	2.15e-40	83.9381	DOWN
ITLN1	-0.903631	5.78811	-14.9055	8.22e-42	1.66e-40	83.7419	DOWN
IGHV3-64	-0.995598	4.8415	-14.7798	3.01e-41	5.9e-40	82.9354	DOWN
SLC13A2	-0.786977	5.4327	-14.7562	3.84e-41	7.48e-40	82.4997	DOWN
MOGAT2	-0.590877	5.92036	-14.6375	1.3e-40	2.47e-39	80.939	DOWN
CDH3	1.15069	6.28555	14.5497	3.21e-40	5.99e-39	80.4039	UP
EEF1A2	-0.679779	5.06837	-14.5207	4.33e-40	8.03e-39	80.3112	DOWN
SLC52A1	-0.691662	5.0265	-14.3935	1.59e-39	2.87e-38	79.0171	DOWN
NXPE4	-0.76255	5.79997	-14.3724	1.97e-39	3.53e-38	78.2895	DOWN
IGKV2D-29	-0.888675	5.10613	-14.3172	3.46e-39	6.1e-38	78.2264	DOWN
IGHV3-43	-0.859983	5.03298	-14.2943	4.38e-39	7.65e-38	78.018	DOWN
IGKV1-6	-0.68688	5.53947	-14.2792	5.1e-39	8.88e-38	77.5863	DOWN
CIDEC	-0.637579	5.2942	-14.1878	1.29e-38	2.2e-37	76.8971	DOWN
IGLV3-10	-0.744107	5.51714	-14.2003	1.14e-38	1.95e-37	76.786	DOWN
ETV4	0.869047	6.33245	14.1535	1.83e-38	3.09e-37	76.605	UP
IGLC7	-0.933605	4.9742	-14.1061	2.96e-38	4.95e-37	76.1284	DOWN
IGLV10-54	-1.02219	5.10803	-14.0012	8.54e-38	1.4e-36	75.0108	DOWN
UBE2QL1	-0.594406	5.05093	-13.9792	1.07e-37	1.74e-36	74.8517	DOWN
RETNLB	-0.61404	5.60006	-13.9676	1.2e-37	1.95e-36	74.4191	DOWN
IGHV2-26	-0.856206	5.11759	-13.8609	3.51e-37	5.56e-36	73.6402	DOWN
ANKRD36BP2	-0.661382	5.10684	-13.8283	4.87e-37	7.6e-36	73.354	DOWN
MAFG-AS1	0.715297	5.72567	13.8422	4.24e-37	6.64e-36	73.0895	UP
IGHV4-28	-0.754017	5.25113	-13.7939	6.88e-37	1.07e-35	72.9399	DOWN
PCSK1N	-0.918157	4.9882	-13.6941	1.87e-36	2.83e-35	72.0217	DOWN
CEACAM7	-0.625031	6.27735	-13.5938	5.09e-36	7.53e-35	70.125	DOWN
CLCA1	-0.930234	6.01614	-13.5732	6.25e-36	9.18e-35	70.0419	DOWN
KCNK10	-0.619622	5.20007	-13.4724	1.7e-35	2.44e-34	69.8175	DOWN
IGHV1-46	-0.598166	5.74217	-13.4605	1.92e-35	2.73e-34	69.2425	DOWN
RP11-349K16.1	-0.81701	5.11061	-13.4128	3.08e-35	4.33e-34	69.2162	DOWN
IGHV3-33	-0.624198	5.63349	-13.4484	2.16e-35	3.07e-34	69.2133	DOWN
IGHV4-59	-0.592906	5.82011	-13.4446	2.24e-35	3.18e-34	69.0156	DOWN
SLC38A4	-0.618028	5.36152	-13.3073	8.74e-35	1.2e-33	68.081	DOWN
IGKV1D-8	-0.892406	4.89765	-13.2533	1.49e-34	2.02e-33	67.6961	DOWN
ESM1	1.77922	5.65809	13.4846	1.51e-35	2.16e-34	66.712	UP
IGHV2-70	-0.864551	5.02913	-13.126	5.2e-34	6.88e-33	66.4397	DOWN
DEFB1	-0.604148	5.34232	-13.1082	6.19e-34	8.16e-33	66.172	DOWN
IGLV2-11	-0.606534	5.84642	-13.1541	3.94e-34	5.24e-33	66.1395	DOWN
AC009014.3	-0.673515	5.3982	-13.0008	1.77e-33	2.27e-32	65.0532	DOWN
RBM24	-0.589294	5.02588	-12.7903	1.37e-32	1.67e-31	63.2256	DOWN
IGHV3-48	-0.681708	5.44174	-12.7534	1.96e-32	2.37e-31	62.6123	DOWN
OTC	-0.847786	4.98806	-12.6559	5.02e-32	5.89e-31	61.9298	DOWN
LGALS9B	-0.695102	5.26421	-12.651	5.26e-32	6.17e-31	61.7826	DOWN
RP5-1120P11.1	1.76218	5.19858	12.9291	3.56e-33	4.48e-32	61.6198	UP
NXPE2	-0.585482	5.30697	-12.6018	8.45e-32	9.82e-31	61.3226	DOWN
IGHV4-61	-0.835871	5.12602	-12.5773	1.07e-31	1.23e-30	61.1401	DOWN
SPATA12	1.28927	5.08602	12.8426	8.25e-33	1.02e-31	60.8206	UP
UGT2B15	-0.701508	5.35724	-12.527	1.73e-31	1.98e-30	60.5148	DOWN
NXPE1	-0.62519	5.76871	-12.5356	1.6e-31	1.83e-30	60.221	DOWN
CASC19	1.90564	4.98037	12.7668	1.72e-32	2.08e-31	60.1321	UP
KLK15	-0.730038	4.95515	-12.4468	3.73e-31	4.14e-30	59.9621	DOWN
MGAM	-0.592691	5.00537	-12.4369	4.1e-31	4.53e-30	59.8686	DOWN
IGLV6-57	-0.59276	5.70518	-12.434	4.22e-31	4.66e-30	59.3326	DOWN
LINC00460	2.3662	4.80364	12.6559	5.02e-32	5.89e-31	59.1149	UP
RP5-884M6.1	2.41141	4.93912	12.5787	1.06e-31	1.22e-30	58.4552	UP
EDN2	-0.653718	5.03068	-12.1677	5.29e-30	5.53e-29	57.3426	DOWN
CEMIP	0.786819	6.3542	12.1202	8.28e-30	8.54e-29	56.8384	UP
IGHV4-55	-0.765326	5.07153	-12.0712	1.31e-29	1.34e-28	56.422	DOWN
IGHV4-31	-0.655386	5.48101	-11.9689	3.43e-29	3.42e-28	55.1703	DOWN
SLITRK6	-0.645751	5.36667	-11.9173	5.55e-29	5.49e-28	54.8068	DOWN
IGLV8-61	-0.743821	5.42143	-11.9179	5.52e-29	5.46e-28	54.7038	DOWN
FJX1	0.693573	5.66677	11.8997	6.54e-29	6.44e-28	54.6255	UP
TMEM61	-0.624689	5.09686	-11.8666	8.91e-29	8.7e-28	54.5436	DOWN
ADRB1	-0.633978	4.91187	-11.7198	3.48e-28	3.26e-27	53.215	DOWN
CLDN1	0.767916	6.2969	11.6351	7.61e-28	6.99e-27	52.386	UP
IGLV9-49	-0.872833	4.78948	-11.5009	2.61e-27	2.32e-26	51.231	DOWN
IGHV1-69	-0.735192	5.22072	-11.3982	6.67e-27	5.77e-26	50.1601	DOWN
FCRL3	-0.651931	4.93346	-11.3456	1.08e-26	9.18e-26	49.8361	DOWN
CST2	2.18692	4.86067	11.5739	1.34e-27	1.21e-26	49.6997	UP
IGLV3-27	-0.819698	4.95885	-11.2587	2.36e-26	1.97e-25	49.0381	DOWN
IGHV1-69-2	-0.587779	5.55058	-11.2931	1.73e-26	1.45e-25	48.9373	DOWN
FAM227A	0.754457	5.42233	11.3034	1.58e-26	1.33e-25	48.8115	UP
IGHD	-0.825663	4.87367	-11.1764	4.97e-26	4.06e-25	48.3222	DOWN
C17orf96	0.729096	5.92138	11.0947	1.04e-25	8.28e-25	47.5962	UP
FLJ22763	-0.599033	5.3517	-11.1021	9.69e-26	7.77e-25	47.4572	DOWN
GABRD	0.925712	5.25135	11.2291	3.09e-26	2.55e-25	47.1173	UP
KCNJ12	-0.665634	4.9879	-11.0284	1.88e-25	1.48e-24	47.0083	DOWN
SFTA2	2.47974	4.90999	11.2417	2.76e-26	2.28e-25	46.9068	UP
SLC28A2	-0.664885	5.2928	-11.0277	1.89e-25	1.49e-24	46.818	DOWN
TBX10	-0.61001	5.31231	-10.9795	2.9e-25	2.26e-24	46.4146	DOWN
MDFI	0.754967	5.92945	10.9064	5.56e-25	4.25e-24	45.9415	UP
DACT2	-0.646602	5.07945	-10.9068	5.54e-25	4.23e-24	45.9059	DOWN
PTPRN	-0.591452	5.11016	-10.9003	5.87e-25	4.47e-24	45.8559	DOWN
PLA2G2D	-0.67328	5.04001	-10.7909	1.54e-24	1.15e-23	44.911	DOWN
RP11-279F6.1	-0.625628	5.03201	-10.6991	3.46e-24	2.54e-23	44.1286	DOWN
SLC15A1	-0.753121	5.18065	-10.7038	3.32e-24	2.44e-23	44.0274	DOWN
PAX5	-0.672402	5.10383	-10.6598	4.89e-24	3.55e-23	43.7362	DOWN
AC007128.1	1.94154	4.83298	10.861	8.31e-25	6.28e-24	43.734	UP
NLRP2	-0.639455	5.29077	-10.6064	7.79e-24	5.57e-23	43.1497	DOWN
RP11-680F8.1	-0.662478	5.03329	-10.5826	9.59e-24	6.83e-23	43.1163	DOWN
PLEKHN1	0.874575	5.60866	10.5252	1.58e-23	1.11e-22	42.2868	UP
URAD	-0.828495	5.22068	-10.2289	2.03e-22	1.32e-21	39.898	DOWN
ACAN	0.896132	5.79264	10.2032	2.52e-22	1.63e-21	39.8276	UP
LINC00659	2.15407	4.80513	10.3723	5.93e-23	4.02e-22	39.7796	UP
ULBP1	1.51067	4.84654	10.2419	1.81e-22	1.19e-21	38.7419	UP
RPL41P1	-0.80915	4.99417	-10.0405	1e-21	6.28e-21	38.3897	DOWN
MCIDAS	1.6508	4.99924	10.19	2.82e-22	1.83e-21	38.3517	UP
IGFL4	1.9688	5.09806	10.1865	2.91e-22	1.88e-21	38.3362	UP
RAET1L	1.77067	4.93068	10.1518	3.91e-22	2.5e-21	38.0443	UP
CASC21	2.29286	4.88793	10.0981	6.16e-22	3.89e-21	37.6225	UP
WNT2	1.73021	5.70643	10.0111	1.28e-21	7.98e-21	36.9893	UP
BTBD16	1.34954	5.03709	9.89924	3.28e-21	1.99e-20	36.0798	UP
PRSS22	0.92304	6.01287	9.7025	1.68e-20	9.77e-20	35.826	UP
WNT3	0.636081	5.56252	9.66493	2.29e-20	1.32e-19	35.4499	UP
OXTR	0.776087	5.37965	9.70244	1.68e-20	9.77e-20	35.4046	UP
PNLIPRP2	-0.74679	5.01331	-9.56275	5.28e-20	2.97e-19	34.6081	DOWN
SERPINA6	-0.71773	5.00117	-9.5474	5.98e-20	3.36e-19	34.5039	DOWN
IGHJ3	-0.76224	4.9657	-9.47438	1.08e-19	5.97e-19	33.9476	DOWN
CBX2	0.691245	5.93109	9.45848	1.23e-19	6.76e-19	33.8667	UP
ZBED9	-0.851064	4.69705	-9.43131	1.54e-19	8.38e-19	33.6566	DOWN
WDR66	0.671016	5.48465	9.43415	1.5e-19	8.2e-19	33.5368	UP
APLN	0.711118	5.80527	9.31671	3.87e-19	2.04e-18	32.7581	UP
ADAMTS6	0.594612	5.40084	9.31039	4.07e-19	2.14e-18	32.5832	UP
SALL4	1.4646	5.41848	9.43459	1.5e-19	8.17e-19	32.5608	UP
RP11-386G11.5	1.08653	5.06349	9.38916	2.16e-19	1.16e-18	32.1963	UP
FAM222A-AS1	1.37136	4.98542	9.38732	2.19e-19	1.18e-18	32.1777	UP
PRR7	0.631004	5.83564	9.15571	1.4e-18	7.1e-18	31.5038	UP
KRT80	1.57	6.06341	9.19527	1.02e-18	5.23e-18	31.3985	UP
KIAA1257	0.845176	5.61413	9.11622	1.91e-18	9.64e-18	31.0611	UP
CFAP45	0.726907	5.10764	9.17171	1.23e-18	6.28e-18	30.8715	UP
LRRC8E	0.923887	5.15018	9.15148	1.44e-18	7.34e-18	30.4684	UP
CCNO	0.635051	5.85488	8.98354	5.42e-18	2.66e-17	30.1711	UP
INHBA	1.04511	6.04821	8.93896	7.68e-18	3.73e-17	29.8401	UP
ULBP3	0.624853	5.32422	8.78145	2.6e-17	1.22e-16	28.4545	UP
GPR3	0.959462	5.24371	8.85005	1.53e-17	7.3e-17	28.3498	UP
LEMD1	2.07971	5.21864	8.85748	1.45e-17	6.91e-17	28.3125	UP
C6orf223	1.13672	6.07945	8.71353	4.38e-17	2.03e-16	28.1346	UP
WISP1	0.616345	5.74998	8.70236	4.78e-17	2.2e-16	28.0545	UP
ATG9B	0.795809	5.63732	8.699	4.9e-17	2.26e-16	27.9811	UP
EGFL6	1.01094	5.4884	8.71034	4.49e-17	2.08e-16	27.7087	UP
FEZF1	2.234	4.47357	8.69332	5.12e-17	2.36e-16	27.075	UP
IL23A	0.650783	5.43717	8.56098	1.4e-16	6.25e-16	26.9227	UP
DDN	1.4861	5.42094	8.64105	7.62e-17	3.46e-16	26.7767	UP
PRR7-AS1	0.884436	5.00973	8.57799	1.23e-16	5.51e-16	26.3085	UP
NOX4	1.13129	5.30189	8.54818	1.54e-16	6.87e-16	26.122	UP
FCN3	0.608211	5.15699	8.47993	2.58e-16	1.13e-15	26.0986	UP
FOSL1	0.765117	5.89563	8.3892	5.08e-16	2.18e-15	25.747	UP
CYSRT1	0.7985	5.18038	8.45697	3.06e-16	1.34e-15	25.6905	UP
ADAMTS12	0.633253	5.98596	8.39076	5.02e-16	2.16e-15	25.6614	UP
PLA2G12B	-0.750397	4.98983	-8.38712	5.16e-16	2.22e-15	25.5878	DOWN
HNRNPA1P21	0.868242	4.98078	8.46015	2.99e-16	1.31e-15	25.4834	UP
ULBP2	1.27139	5.14209	8.43811	3.53e-16	1.53e-15	25.3433	UP
KLHL35	0.794795	5.65396	8.32547	8.16e-16	3.45e-15	25.2576	UP
RP11-350J20.12	1.64692	4.93783	8.38965	5.07e-16	2.18e-15	24.997	UP
FIRRE	1.80954	4.80342	8.36713	5.99e-16	2.56e-15	24.8318	UP
MSX1	0.700284	5.68005	8.22655	1.69e-15	6.99e-15	24.5863	UP
GRIN2D	0.881738	6.10925	8.18705	2.26e-15	9.26e-15	24.255	UP
KLK7	2.22788	4.86247	8.26122	1.31e-15	5.48e-15	24.1135	UP
BLACAT1	1.72726	5.51334	8.25624	1.36e-15	5.67e-15	24.1067	UP
S100A2	0.861278	5.69631	8.138	3.24e-15	1.31e-14	23.9362	UP
SHISA6	-0.677863	4.80316	-8.10707	4.05e-15	1.63e-14	23.6873	DOWN
UGT2B17	-0.82615	5.50971	-8.18582	2.28e-15	9.33e-15	23.5315	DOWN
FOXP4-AS1	0.630168	5.43447	8.07306	5.19e-15	2.07e-14	23.4512	UP
CGREF1	0.651352	6.04994	8.00429	8.53e-15	3.35e-14	22.8644	UP
EPHX4	1.19586	5.69674	7.99453	9.15e-15	3.59e-14	22.7308	UP
MIR17HG	0.629102	5.47298	7.92722	1.48e-14	5.72e-14	22.4663	UP
PTGES2-AS1	1.04276	4.92172	7.94973	1.26e-14	4.9e-14	22.0151	UP
TRIM29	0.661877	6.24257	7.90264	1.77e-14	6.79e-14	21.9886	UP
PDZD7	0.602769	5.29223	7.84339	2.69e-14	1.02e-13	21.8103	UP
HAGHL	0.648541	5.8287	7.78484	4.07e-14	1.53e-13	21.4726	UP
PDX1	1.0738	5.91641	7.73331	5.85e-14	2.17e-13	21.1483	UP
EVA1A	0.800008	5.77067	7.68394	8.26e-14	3.03e-13	20.8192	UP
OTX1	1.98762	5.24818	7.76244	4.77e-14	1.78e-13	20.804	UP
RP11-126L15.4	0.68087	5.11862	7.72686	6.12e-14	2.27e-13	20.7863	UP
SMKR1	1.30268	5.14585	7.74431	5.42e-14	2.02e-13	20.68	UP
CCDC78	1.00699	5.45672	7.68738	8.07e-14	2.96e-13	20.5935	UP
GRHL3	0.899392	5.56744	7.63243	1.18e-13	4.29e-13	20.4038	UP
CTHRC1	0.623793	6.03973	7.64879	1.06e-13	3.84e-13	20.3823	UP
PERM1	0.974485	5.23592	7.67941	8.53e-14	3.12e-13	20.3044	UP
GYLTL1B	0.742902	6.10468	7.62179	1.27e-13	4.61e-13	20.2411	UP
CLDN16	1.22252	4.86319	7.6756	8.76e-14	3.21e-13	20.219	UP
SH3TC2	0.670776	5.84312	7.60169	1.46e-13	5.27e-13	20.2176	UP
FEZF1-AS1	2.5427	4.85437	7.66088	9.71e-14	3.55e-13	20.1306	UP
CCAT1	1.23423	5.78702	7.59743	1.51e-13	5.42e-13	20.1251	UP
SLC39A2	-0.727759	4.78558	-7.59128	1.57e-13	5.65e-13	20.1167	DOWN
SPTBN5	0.603332	5.68368	7.57623	1.75e-13	6.24e-13	20.077	UP
MAPK15	1.04914	5.60271	7.58532	1.64e-13	5.88e-13	20.0208	UP
IRX5	1.5133	4.78171	7.64143	1.11e-13	4.04e-13	19.9951	UP
LINC00858	2.02769	4.71853	7.53205	2.37e-13	8.38e-13	19.2944	UP
RP11-424C20.2	0.660256	5.14058	7.47045	3.61e-13	1.26e-12	19.1695	UP
RP5-908M14.5	1.25633	4.81643	7.40641	5.59e-13	1.93e-12	18.5035	UP
VWA2	0.73613	5.98417	7.33559	9.02e-13	3.06e-12	18.4045	UP
SLC18A1	-0.611473	4.95204	-7.26977	1.4e-12	4.7e-12	17.9476	DOWN
RP11-1029J19.4	1.15578	4.98941	7.30764	1.09e-12	3.67e-12	17.8962	UP
FAP	0.719647	5.79587	7.19419	2.32e-12	7.64e-12	17.5575	UP
KIF26B	0.641195	5.84589	7.18893	2.4e-12	7.9e-12	17.4677	UP
ASCL5	1.30947	5.02914	7.23536	1.77e-12	5.88e-12	17.4515	UP
GLS2	0.834475	5.12046	7.21219	2.06e-12	6.81e-12	17.3557	UP
RP11-150O12.1	0.925146	5.36487	7.1796	2.56e-12	8.39e-12	17.3219	UP
RNF183	0.740902	5.60925	7.1307	3.53e-12	1.15e-11	17.1961	UP
MIR503HG	0.948713	5.05495	7.17548	2.63e-12	8.61e-12	17.0835	UP
KLK6	2.75582	5.50932	7.10535	4.18e-12	1.35e-11	16.6709	UP
ZNRF3	0.609404	4.98995	7.08774	4.69e-12	1.51e-11	16.6618	UP
ACBD7	0.726695	5.09823	7.04574	6.17e-12	1.97e-11	16.4233	UP
RP11-817I4.1	0.600553	5.02903	7.03482	6.63e-12	2.11e-11	16.4122	UP
RP11-82L18.2	0.880387	4.98311	7.03302	6.71e-12	2.14e-11	16.2151	UP
FAM150A	1.23136	5.09334	7.0209	7.26e-12	2.31e-11	16.1478	UP
RP5-1028K7.2	0.610858	5.02401	6.96928	1.01e-11	3.19e-11	15.9795	UP
FAM132B	0.924516	5.25977	6.97688	9.66e-12	3.04e-11	15.9735	UP
LINC01572	0.592767	4.97382	6.96116	1.07e-11	3.36e-11	15.9173	UP
SIM2	0.889551	5.87297	6.92755	1.33e-11	4.14e-11	15.9018	UP
C2orf61	1.60101	4.79485	6.97155	1e-11	3.14e-11	15.84	UP
SHISA2	0.685354	5.50915	6.90275	1.56e-11	4.83e-11	15.7697	UP
TNNI3	1.51357	4.82192	6.95776	1.09e-11	3.43e-11	15.7587	UP
SLC4A11	0.792237	5.69414	6.89046	1.69e-11	5.22e-11	15.6911	UP
KRT7	0.62328	5.68721	6.86978	1.93e-11	5.93e-11	15.5267	UP
C2orf70	0.834584	5.61181	6.83891	2.35e-11	7.16e-11	15.3763	UP
CRNDE	1.32852	5.46016	6.8545	2.12e-11	6.51e-11	15.1653	UP
CTD-2147F2.1	1.90996	4.83843	6.85343	2.14e-11	6.55e-11	15.1423	UP
ADAM12	0.713777	5.89995	6.80623	2.89e-11	8.74e-11	15.0611	UP
CPNE7	1.1006	5.98249	6.77475	3.53e-11	1.06e-10	14.9794	UP
STC2	0.727354	5.98037	6.78087	3.39e-11	1.02e-10	14.8529	UP
TMEM74B	0.614141	5.66509	6.71119	5.27e-11	1.57e-10	14.5622	UP
ELFN1-AS1	1.25868	5.68028	6.66087	7.22e-11	2.13e-10	14.1987	UP
CORIN	0.876981	5.2829	6.5352	1.57e-10	4.52e-10	13.4411	UP
NKD2	0.720744	5.95562	6.52571	1.67e-10	4.78e-10	13.3379	UP
RP11-752L20.3	0.622398	5.03679	6.51389	1.79e-10	5.13e-10	13.3171	UP
UCN	0.760468	4.99974	6.50114	1.94e-10	5.52e-10	13.1135	UP
CST1	2.43786	5.66508	6.46842	2.37e-10	6.69e-10	12.9419	UP
CHI3L1	0.723461	6.0035	6.46261	2.46e-10	6.93e-10	12.9285	UP
RP13-890H12.2	0.715914	4.92995	6.45729	2.54e-10	7.14e-10	12.8643	UP
FOXQ1	1.27629	6.07033	6.37047	4.29e-10	1.19e-09	12.592	UP
CXCL8	0.658003	6.17533	6.43505	2.9e-10	8.14e-10	12.5495	UP
STRA6	1.31695	5.65493	6.34862	4.9e-10	1.35e-09	12.3627	UP
CLDN14	0.967917	4.97849	6.35847	4.61e-10	1.27e-09	12.3137	UP
DHRS2	1.02058	5.29934	6.33014	5.47e-10	1.5e-09	12.195	UP
GTF2IP1	-0.666682	4.43467	-6.29889	6.6e-10	1.79e-09	12.1691	DOWN
C2CD4A	0.82039	5.95956	6.31531	5.98e-10	1.63e-09	12.166	UP
LINC01356	0.926585	5.01311	6.32877	5.52e-10	1.51e-09	12.1504	UP
AC021218.2	0.795189	5.95867	6.30469	6.37e-10	1.73e-09	12.0827	UP
IL11	1.20564	5.36205	6.31373	6.04e-10	1.65e-09	12.0757	UP
GRIN2B	0.782678	5.65454	6.26866	7.9e-10	2.14e-09	11.9983	UP
GAD1	1.59852	5.16955	6.29832	6.62e-10	1.8e-09	11.988	UP
SIX4	0.700498	5.11765	6.25885	8.37e-10	2.26e-09	11.8798	UP
MATN3	0.599362	5.34819	6.24101	9.31e-10	2.5e-09	11.8617	UP
DNAH5	0.717405	5.20449	6.21157	1.11e-09	2.96e-09	11.6508	UP
CLEC5A	1.01661	5.30129	6.22055	1.05e-09	2.81e-09	11.6125	UP
HTR1D	1.22869	5.66259	6.19993	1.19e-09	3.16e-09	11.5798	UP
KRTAP5-1	0.630985	5.06654	6.20313	1.16e-09	3.11e-09	11.5645	UP
TMEM105	0.948174	5.31329	6.15943	1.51e-09	3.98e-09	11.3085	UP
RP11-150O12.6	0.946994	5.38466	6.11756	1.92e-09	5.05e-09	11.1152	UP
DLX4	0.765392	4.9521	6.06065	2.68e-09	6.95e-09	10.695	UP
RP11-492E3.2	0.80411	5.3192	6.01421	3.5e-09	8.99e-09	10.5774	UP
OLR1	0.758595	5.48315	6.00883	3.61e-09	9.26e-09	10.5722	UP
TG	0.936819	5.65185	6.0029	3.74e-09	9.58e-09	10.54	UP
TESC	0.668248	6.13455	6.04483	2.94e-09	7.59e-09	10.3637	UP
NANOS3	1.06451	5.03386	5.98455	4.15e-09	1.06e-08	10.295	UP
SNORA73B	0.78946	5.03842	5.91759	6.08e-09	1.53e-08	9.94704	UP
DSG4	0.830268	5.09018	5.88714	7.23e-09	1.81e-08	9.79724	UP
PRR36	0.852549	5.66652	5.82662	1.02e-08	2.52e-08	9.57423	UP
COL11A1	1.30515	5.9531	5.8114	1.11e-08	2.73e-08	9.51165	UP
STK31	0.933477	5.37617	5.8094	1.12e-08	2.76e-08	9.4769	UP
LY6G6C	0.950274	4.92687	5.80863	1.12e-08	2.77e-08	9.37806	UP
CASC8	0.873894	5.23358	5.75905	1.48e-08	3.62e-08	9.18008	UP
CXCL11	0.712093	5.76187	5.7439	1.61e-08	3.92e-08	9.02828	UP
SAPCD1	0.728508	4.9502	5.73749	1.67e-08	4.05e-08	9.0162	UP
CYP2D7	0.753954	5.18423	5.66133	2.54e-08	6.08e-08	8.69579	UP
GSDMA	0.606614	5.45668	5.63496	2.93e-08	6.98e-08	8.56236	UP
SLCO1B3	1.54303	4.79383	5.6095	3.37e-08	7.99e-08	8.37018	UP
DNASE1L2	0.693946	5.09882	5.54969	4.66e-08	1.09e-07	8.12476	UP
PAH	1.45009	4.81477	5.53465	5.05e-08	1.18e-07	8.00033	UP
CTD-2540F13.2	0.65737	5.0026	5.48452	6.6e-08	1.53e-07	7.79135	UP
KRT17	1.18894	5.79042	5.45791	7.61e-08	1.75e-07	7.69789	UP
SPATA3-AS1	0.725223	4.95831	5.46797	7.21e-08	1.66e-07	7.67751	UP
NPFFR1	0.782404	5.44288	5.45301	7.81e-08	1.8e-07	7.67201	UP
C20orf195	0.737311	5.02762	5.46315	7.4e-08	1.71e-07	7.66502	UP
RP11-23P13.6	1.11969	4.98484	5.46156	7.46e-08	1.72e-07	7.64571	UP
CNTD2	1.22346	5.49108	5.45225	7.84e-08	1.8e-07	7.61753	UP
LRRC36	0.70961	5.40999	5.41197	9.7e-08	2.21e-07	7.46349	UP
TH	1.03636	4.80553	5.41476	9.56e-08	2.18e-07	7.41568	UP
GJB4	1.22579	5.38597	5.39143	1.08e-07	2.46e-07	7.31121	UP
C19orf26	0.701516	5.13038	5.37141	1.2e-07	2.72e-07	7.25745	UP
PKP1	0.664884	5.69877	5.36682	1.23e-07	2.78e-07	7.1068	UP
PLAC4	1.09474	4.937	5.30894	1.66e-07	3.72e-07	6.91229	UP
BBOX1-AS1	1.43358	5.13684	5.29334	1.8e-07	4.03e-07	6.84123	UP
SH3PXD2A-AS1	0.649868	5.49531	5.29007	1.83e-07	4.1e-07	6.82601	UP
RP11-353N14.4	0.986885	5.30187	5.16588	3.47e-07	7.56e-07	6.26327	UP
FAM72D	0.58527	4.89541	5.14158	3.92e-07	8.51e-07	6.15044	UP
KRT6B	1.68906	5.3854	5.14162	3.92e-07	8.51e-07	6.13442	UP
MMP1	0.644214	6.1863	5.2382	2.4e-07	5.28e-07	6.01761	UP
RIPPLY3	0.980105	4.78657	5.11207	4.55e-07	9.83e-07	5.99213	UP
MCEMP1	0.957554	4.81704	5.10801	4.65e-07	1e-06	5.97405	UP
COL10A1	1.9435	5.66063	5.10367	4.75e-07	1.02e-06	5.96098	UP
MYADML2	1.15077	5.11408	5.0369	6.63e-07	1.41e-06	5.65391	UP
RP11-524D16__A.3	0.600761	5.11017	5.02905	6.89e-07	1.47e-06	5.64794	UP
RP3-323A16.1	0.718268	5.18011	4.99994	7.96e-07	1.68e-06	5.5152	UP
RP11-1143G9.5	1.0041	5.11508	5.00332	7.83e-07	1.66e-06	5.50226	UP
IL1A	0.77376	5.21988	4.98596	8.53e-07	1.8e-06	5.4513	UP
NOTUM	1.96986	5.69966	4.98234	8.68e-07	1.83e-06	5.41095	UP
RP11-58O9.2	0.672282	5.58973	4.95239	1.01e-06	2.11e-06	5.1759	UP
POU5F1B	0.963409	5.58254	4.92875	1.13e-06	2.35e-06	5.16661	UP
DPEP1	0.870109	6.31088	5.03668	6.63e-07	1.41e-06	5.12543	UP
PIWIL1	1.45279	5.13092	4.90901	1.24e-06	2.58e-06	5.08205	UP
RP11-353N14.5	0.77822	5.26929	4.86585	1.53e-06	3.15e-06	4.90894	UP
TREM1	0.656562	5.42465	4.871	1.49e-06	3.08e-06	4.86972	UP
TNNT2	0.752834	4.8969	4.85969	1.58e-06	3.24e-06	4.86272	UP
MSX2	1.02154	5.798	4.84011	1.73e-06	3.55e-06	4.71601	UP
TACSTD2	0.6394	5.92655	4.88774	1.38e-06	2.85e-06	4.59987	UP
GRP	0.987779	4.85613	4.78636	2.24e-06	4.54e-06	4.54368	UP
TFAP2A	0.587142	5.54836	4.80765	2.03e-06	4.12e-06	4.49283	UP
RP11-474D1.3	2.50608	5.38052	4.75687	2.58e-06	5.2e-06	4.41979	UP
SLCO4A1-AS1	0.593601	5.68637	4.79582	2.14e-06	4.35e-06	4.35326	UP
RP11-326C3.2	0.742492	5.45505	4.74437	2.74e-06	5.51e-06	4.32598	UP
RP11-54H7.4	1.52943	5.30429	4.68176	3.67e-06	7.3e-06	4.09875	UP
KIAA1875	0.595046	5.25925	4.64683	4.32e-06	8.54e-06	3.92435	UP
NXPH4	1.02619	5.16607	4.60037	5.36e-06	1.05e-05	3.75611	UP
UCA1	0.647811	5.80534	4.63547	4.55e-06	8.98e-06	3.5759	UP
CILP2	0.604371	5.06887	4.53667	7.17e-06	1.39e-05	3.48898	UP
MMP10	0.96752	5.33054	4.4802	9.26e-06	1.78e-05	3.26335	UP
RP11-776H12.1	1.09663	5.0062	4.3938	1.36e-05	2.57e-05	2.91243	UP
SP5	0.627205	5.79591	4.4713	9.64e-06	1.85e-05	2.8852	UP
TMPRSS5	0.718821	5.00121	4.36829	1.52e-05	2.86e-05	2.81143	UP
XXbac-BPG32J3.19	1.56911	4.98904	4.32368	1.85e-05	3.45e-05	2.63436	UP
CITED1	0.679593	5.03384	4.3208	1.88e-05	3.49e-05	2.62123	UP
CA9	0.823805	5.91976	4.37967	1.45e-05	2.73e-05	2.52064	UP
TCN1	1.55536	5.37744	4.28622	2.18e-05	4.04e-05	2.48755	UP
PPAPDC1A	0.82681	5.19631	4.28775	2.17e-05	4.01e-05	2.48696	UP
NPW	0.715339	4.9612	4.25809	2.47e-05	4.54e-05	2.37794	UP
SAA2	0.915991	5.08943	4.24382	2.62e-05	4.81e-05	2.32265	UP
KLK10	0.698343	5.97953	4.31662	1.91e-05	3.56e-05	2.09891	UP
SLC22A11	1.04895	4.88638	4.15263	3.87e-05	7e-05	1.9735	UP
MMP7	1.75585	5.97108	4.12243	4.39e-05	7.91e-05	1.85543	UP
LY6G6D	1.48426	4.95103	4.09841	4.86e-05	8.7e-05	1.76904	UP
RP11-329L6.2	0.741608	5.32815	4.10193	4.79e-05	8.58e-05	1.7425	UP
DSG3	1.14651	5.31565	4.08794	5.07e-05	9.08e-05	1.72936	UP
CLDN2	1.09106	6.20234	4.17882	3.46e-05	6.28e-05	1.66142	UP
COMP	1.47964	5.59023	4.06746	5.52e-05	9.85e-05	1.65262	UP
TLX1	1.13908	5.35529	4.06179	5.66e-05	0.000100706	1.63163	UP
MMP3	0.96111	5.96104	4.13801	4.11e-05	7.43e-05	1.6121	UP
UNC93A	1.0649	5.13925	3.94768	9.03e-05	0.000157686	1.21368	UP
AQP9	0.618072	5.41834	3.93782	9.39e-05	0.000163799	0.991601	UP
FABP6	1.33559	5.60109	3.88614	0.000115627	0.000199786	0.984417	UP
CXCL5	1.08281	5.58402	3.85287	0.000131999	0.000226561	0.809664	UP
GUCY1B2	0.611423	4.87733	3.74737	0.00019963	0.000337203	0.505995	UP
SLC13A3	0.651036	5.39298	3.75503	0.000193784	0.000327771	0.36324	UP
AC016708.2	0.605172	5.31174	3.67224	0.000266441	0.000445391	0.114424	UP
ALDH3B2	0.842175	5.03865	3.5923	0.000360314	0.000594079	-0.0169969	UP
PRSS33	0.982585	5.22379	3.57524	0.000384018	0.000631562	-0.0749399	UP
SLC35D3	0.844533	5.30971	3.56048	0.000405693	0.000665395	-0.19084	UP
ZIC2	1.057	4.89262	3.53345	0.000448381	0.000731652	-0.209263	UP
CSF3	0.813931	5.08629	3.53361	0.000448107	0.000731352	-0.211372	UP
GLYATL1	0.657577	5.16062	3.49972	0.000507546	0.000822427	-0.389798	UP
PAX9	0.7383	5.17082	3.47391	0.000557668	0.000898903	-0.454092	UP
CEL	0.856163	5.67066	3.46882	0.000568092	0.000914711	-0.675315	UP
PRKCG	0.703129	4.88693	3.38016	0.000781323	0.00123966	-0.697821	UP
TMEM211	0.816654	5.21377	3.38309	0.000773228	0.00122765	-0.72509	UP
KRT23	1.16322	5.88529	3.38467	0.000768878	0.00122146	-0.914671	UP
TSPEAR	0.671286	4.89334	3.30264	0.00102666	0.00160683	-0.937707	UP
PRSS3P2	0.984005	4.99096	3.24602	0.00124908	0.00193431	-1.11023	UP
AMH	0.749906	5.14226	3.12169	0.00190264	0.00288093	-1.50835	UP
PRAC2	0.715754	4.90696	3.10774	0.00199294	0.00300955	-1.51595	UP
ODAM	0.605491	5.16613	3.15077	0.00172638	0.0026265	-1.5228	UP
MUC5AC	0.790562	5.54194	3.10328	0.00202267	0.0030505	-1.76075	UP
REG1B	1.10639	5.09722	2.81477	0.00507457	0.00734311	-2.32502	UP
TRPM2-AS	0.761171	5.36002	2.80244	0.00526936	0.00760943	-2.51694	UP
EVX1	0.640245	5.34671	2.77751	0.00568433	0.00817822	-2.65005	UP
REG3A	1.10743	5.47985	2.17579	0.0300405	0.0395416	-3.84595	UP
DUSP27	0.835895	5.19416	2.1587	0.0313503	0.0411582	-3.87205	UP
REG1A	0.925552	5.90855	1.98082	0.0481617	0.0616259	-4.68247	UP
