# Supplementary material for: Prognostic cellular senescence-related lncRNAs patterns to predict clinical outcome and immune response in colon cancer
Source: Front Immunol. 2024 Sep 2;15:1450135. doi: 10.3389/fimmu.2024.1450135 (PMC11443174; doi:10.3389/fimmu.2024.1450135)
Supplement: Supplementary Table 5 — The relationship between CS-related DEGs and lncRNAs. [file Table5.xlsx]

## Sheet: TableS2
	LncRNAs	senescence genes	Cor	P-value
	A1BG-AS1	ACKR1	0.537	2.214e-38
	A2M-AS1	ACKR1	0.569	5.648e-44
	AC002091.1	ACKR1	0.521	6.996e-36
	AC002398.2	ACKR1	0.508	7.493e-34
	AC004947.1	ACKR1	0.529	4.248e-37
	AC005180.1	ACKR1	0.657	1.276e-62
	AC005180.2	ACKR1	0.679	2.667e-68
	AC007541.1	ACKR1	0.501	7.146e-33
	AC007671.1	ACKR1	0.513	1.182e-34
	AC009102.2	ACKR1	0.538	1.521e-38
	AC009549.1	ACKR1	0.519	1.762e-35
	AC010247.2	ACKR1	0.515	6.37e-35
	AC013553.3	ACKR1	0.504	2.931e-33
	AC015819.1	ACKR1	0.523	3.699e-36
	AC016747.1	ACKR1	0.646	6.76e-60
	AC022034.1	ACKR1	0.643	3.236e-59
	AC022034.4	ACKR1	0.505	1.628e-33
	AC022706.1	ACKR1	0.518	2.339e-35
	AC024337.2	ACKR1	0.599	1.419e-49
	AC025165.1	ACKR1	0.505	2.193e-33
	AC027097.2	ACKR1	0.538	1.336e-38
	AC027807.2	ACKR1	0.515	5.664e-35
	AC036108.3	ACKR1	0.529	4.679e-37
	AC040168.1	ACKR1	0.577	2.541e-45
	AC046185.3	ACKR1	0.552	7.565e-41
	AC053503.3	ACKR1	0.574	8.893e-45
	AC053503.5	ACKR1	0.523	3.262e-36
	AC080100.1	ACKR1	0.548	2.729e-40
	AC090559.1	ACKR1	0.602	2.665e-50
	AC090825.1	ACKR1	0.602	3.22e-50
	AC092376.2	ACKR1	0.554	2.657e-41
	AC092645.1	ACKR1	0.583	1.599e-46
	AC093278.2	ACKR1	0.706	3.756e-76
	AC093535.2	ACKR1	0.51	2.879e-34
	AC093627.6	ACKR1	0.538	1.686e-38
	AC104083.1	ACKR1	0.629	4.554e-56
	AC104260.2	ACKR1	0.641	8.778e-59
	AC104825.1	ACKR1	0.573	1.248e-44
	AC106786.1	ACKR1	0.567	1.731e-43
	AC106881.1	ACKR1	0.588	1.903e-47
	AC107959.1	ACKR1	0.645	1.44e-59
	AC110995.1	ACKR1	0.568	9.381e-44
	AC129507.1	ACKR1	0.578	1.408e-45
	AC135012.3	ACKR1	0.637	7.655e-58
	AC144831.1	ACKR1	0.541	4.879e-39
	AC243960.1	ACKR1	0.52	9.75e-36
	ACTA2-AS1	ACKR1	0.593	1.95e-48
	ADAMTS9-AS1	ACKR1	0.517	2.72e-35
	ADAMTS9-AS2	ACKR1	0.618	1.331e-53
	AF001548.1	ACKR1	0.549	2.312e-40
	AF111167.2	ACKR1	0.539	9.113e-39
	AF165147.1	ACKR1	0.526	1.072e-36
	AL049775.1	ACKR1	0.559	3.386e-42
	AL109741.1	ACKR1	0.614	8.447e-53
	AL132642.1	ACKR1	0.6	7.348e-50
	AL136084.2	ACKR1	0.582	3.021e-46
	AL137026.1	ACKR1	0.528	6.344e-37
	AL157895.1	ACKR1	0.553	4.008e-41
	AL157996.1	ACKR1	0.51	2.89e-34
	AL161785.1	ACKR1	0.669	1.168e-65
	AL356489.2	ACKR1	0.554	3.227e-41
	AL357054.4	ACKR1	0.563	8.404e-43
	AL359853.1	ACKR1	0.503	4.254e-33
	AL365361.1	ACKR1	0.57	4.97e-44
	AL391807.1	ACKR1	0.562	1.149e-42
	AL583785.1	ACKR1	0.595	6.75e-49
	AL590226.1	ACKR1	0.587	2.731e-47
	AP000892.4	ACKR1	0.652	2.742e-61
	AP000894.2	ACKR1	0.541	4.143e-39
	AP001107.5	ACKR1	0.612	2.693e-52
	AP001189.3	ACKR1	0.556	1.183e-41
	AP001528.2	ACKR1	0.668	1.675e-65
	AP003071.3	ACKR1	0.511	2.151e-34
	AP003071.4	ACKR1	0.691	1.171e-71
	AP003548.1	ACKR1	0.501	6.948e-33
	BNC2-AS1	ACKR1	0.565	3.287e-43
	CADM3-AS1	ACKR1	0.762	4.071e-95
	CHL1-AS2	ACKR1	0.513	1.178e-34
	DIRC3	ACKR1	0.615	5.021e-53
	EDIL3-DT	ACKR1	0.573	1.196e-44
	FENDRR	ACKR1	0.618	1.556e-53
	FGF14-AS2	ACKR1	0.558	5.736e-42
	FRMD6-AS2	ACKR1	0.505	1.858e-33
	GAS1RR	ACKR1	0.583	2.061e-46
	HAND2-AS1	ACKR1	0.587	2.983e-47
	HID1-AS1	ACKR1	0.551	1.107e-40
	LIFR-AS1	ACKR1	0.597	2.67e-49
	LINC00092	ACKR1	0.59	7.175e-48
	LINC00472	ACKR1	0.501	6.074e-33
	LINC00578	ACKR1	0.58	7.179e-46
	LINC00682	ACKR1	0.527	9.01e-37
	LINC00702	ACKR1	0.574	7.476e-45
	LINC00840	ACKR1	0.507	1.109e-33
	LINC00900	ACKR1	0.595	6.47e-49
	LINC00987	ACKR1	0.692	7.856e-72
	LINC01082	ACKR1	0.52	1.118e-35
	LINC01140	ACKR1	0.645	1.416e-59
	LINC01197	ACKR1	0.698	1.553e-73
	LINC01266	ACKR1	0.544	1.305e-39
	LINC01352	ACKR1	0.551	9.106e-41
	LINC01354	ACKR1	0.647	3.404e-60
	LINC01475	ACKR1	0.53	2.422e-37
	LINC01537	ACKR1	0.559	4.047e-42
	LINC01679	ACKR1	0.544	1.802e-39
	LINC01781	ACKR1	0.549	2.164e-40
	LINC01798	ACKR1	0.515	5.217e-35
	LINC01936	ACKR1	0.51	3.731e-34
	LINC01985	ACKR1	0.561	1.612e-42
	LINC02147	ACKR1	0.542	2.68e-39
	LINC02185	ACKR1	0.601	4.737e-50
	LINC02202	ACKR1	0.602	2.822e-50
	LINC02381	ACKR1	0.701	1.788e-74
	LINC02593	ACKR1	0.504	3.047e-33
	LINC02798	ACKR1	0.522	4.607e-36
	LINC02829	ACKR1	0.599	1.301e-49
	LRRC8C-DT	ACKR1	0.519	1.588e-35
	LRRK2-DT	ACKR1	0.538	1.364e-38
	MAGI2-AS3	ACKR1	0.703	3.858e-75
	MBNL1-AS1	ACKR1	0.622	1.823e-54
	MEF2C-AS1	ACKR1	0.619	8.667e-54
	MIR1-1HG-AS1	ACKR1	0.561	1.953e-42
	MIR100HG	ACKR1	0.681	8.326e-69
	MIR497HG	ACKR1	0.639	3.46e-58
	NR2F2-AS1	ACKR1	0.638	6.192e-58
	PCAT19	ACKR1	0.581	4.629e-46
	PCED1B-AS1	ACKR1	0.584	1.172e-46
	PDE2A-AS2	ACKR1	0.509	4.802e-34
	PGM5-AS1	ACKR1	0.576	3.123e-45
	PTPRN2-AS1	ACKR1	0.56	3.101e-42
	RBMS3-AS3	ACKR1	0.532	1.221e-37
	RERG-IT1	ACKR1	0.524	2.911e-36
	RFPL1S	ACKR1	0.575	4.505e-45
	SENCR	ACKR1	0.675	3.147e-67
	SERTAD4-AS1	ACKR1	0.556	1.607e-41
	SETBP1-DT	ACKR1	0.664	3.039e-64
	ZNF582-AS1	ACKR1	0.601	5.116e-50
	ZNF667-AS1	ACKR1	0.765	1.265e-96
	AC005358.1	FOXQ1	-0.577	2.389e-45
	AC007182.1	FOXQ1	-0.619	8.809e-54
	AC012317.2	FOXQ1	-0.583	1.47e-46
	AC015908.3	FOXQ1	-0.53	2.404e-37
	AC016027.1	FOXQ1	-0.516	4.883e-35
	AC073050.1	FOXQ1	-0.552	7.121e-41
	AC073283.2	FOXQ1	-0.532	1.519e-37
	AC087379.1	FOXQ1	-0.553	4.372e-41
	AC092652.1	FOXQ1	-0.566	2.34e-43
	AC092723.1	FOXQ1	-0.531	1.832e-37
	AC105749.1	FOXQ1	-0.528	5.975e-37
	AL121790.2	FOXQ1	-0.531	2.013e-37
	AL353801.1	FOXQ1	-0.515	5.686e-35
	AP000866.2	FOXQ1	-0.572	1.652e-44
	ARHGAP15-AS1	FOXQ1	-0.517	2.998e-35
	CA3-AS1	FOXQ1	-0.532	1.361e-37
	CDKN2B-AS1	FOXQ1	-0.569	6.752e-44
	LINC00507	FOXQ1	-0.538	1.541e-38
	LINC00974	FOXQ1	-0.585	8.158e-47
	LINC01645	FOXQ1	-0.539	1.205e-38
	LINC02000	FOXQ1	-0.568	1.262e-43
	LINC02023	FOXQ1	-0.574	9.456e-45
	LINC02487	FOXQ1	0.503	3.353e-33
	MAFG-DT	FOXQ1	0.539	1.098e-38
	SEMA6A-AS2	FOXQ1	-0.52	8.828e-36
	SLCO4A1-AS1	FOXQ1	0.522	4.294e-36
	TMEM220-AS1	FOXQ1	-0.591	4.985e-48
	VSTM2A-OT1	FOXQ1	-0.55	1.511e-40
	AC002456.1	NOX4	0.518	1.962e-35
	AC004160.1	NOX4	0.614	9.698e-53
	AC007998.3	NOX4	0.571	3.308e-44
	AC009093.1	NOX4	0.697	2.814e-73
	AC009093.2	NOX4	0.686	3.724e-70
	AC011352.1	NOX4	0.649	1.15e-60
	AC011352.3	NOX4	0.689	3.781e-71
	AC016747.1	NOX4	0.632	1.013e-56
	AC022467.1	NOX4	0.52	1.171e-35
	AC027288.3	NOX4	0.616	4.16e-53
	AC068473.4	NOX4	0.582	2.834e-46
	AC078850.1	NOX4	0.536	3.526e-38
	AC079298.3	NOX4	0.62	4.185e-54
	AC080038.1	NOX4	0.543	2.408e-39
	AC083967.1	NOX4	0.51	3.024e-34
	AC087286.2	NOX4	0.556	1.529e-41
	AC090559.1	NOX4	0.512	1.752e-34
	AC099066.2	NOX4	0.544	1.569e-39
	AC104083.1	NOX4	0.58	6.712e-46
	AC104461.1	NOX4	0.542	3.291e-39
	AC106786.1	NOX4	0.566	2.085e-43
	AC112721.1	NOX4	0.578	1.436e-45
	AC112721.2	NOX4	0.586	4.015e-47
	AC114284.1	NOX4	0.523	3.815e-36
	AC134312.5	NOX4	0.757	2.495e-93
	AL031651.2	NOX4	0.506	1.378e-33
	AL035409.1	NOX4	0.627	1.252e-55
	AL139147.1	NOX4	0.595	6.63e-49
	AL356417.2	NOX4	0.777	3.494e-101
	AL391422.4	NOX4	0.56	2.312e-42
	AL583785.1	NOX4	0.572	2.015e-44
	AP000695.1	NOX4	0.756	4.295e-93
	AP000695.2	NOX4	0.678	5.891e-68
	AP001189.3	NOX4	0.574	7.159e-45
	AP001434.1	NOX4	0.67	5.207e-66
	BX322234.1	NOX4	0.564	5.501e-43
	CCDC144NL-AS1	NOX4	0.597	2.971e-49
	DIRC1	NOX4	0.551	1.068e-40
	DNM3OS	NOX4	0.621	2.793e-54
	FAM225A	NOX4	0.513	1.272e-34
	FAM225B	NOX4	0.618	1.433e-53
	FNDC1-IT1	NOX4	0.581	4.514e-46
	GRASLND	NOX4	0.667	3.682e-65
	HMGA2-AS1	NOX4	0.754	3.049e-92
	INHBA-AS1	NOX4	0.515	6.613e-35
	L3MBTL4-AS1	NOX4	0.507	9.248e-34
	LINC00578	NOX4	0.6	6.709e-50
	LINC00900	NOX4	0.542	3.104e-39
	LINC00922	NOX4	0.557	8.351e-42
	LINC00924	NOX4	0.526	1.209e-36
	LINC00968	NOX4	0.619	1.027e-53
	LINC01048	NOX4	0.611	4.861e-52
	LINC01050	NOX4	0.598	1.933e-49
	LINC01094	NOX4	0.764	6.137e-96
	LINC01235	NOX4	0.575	5.37e-45
	LINC01503	NOX4	0.522	5.506e-36
	LINC01561	NOX4	0.706	3.742e-76
	LINC01614	NOX4	0.862	7.866e-148
	LINC01615	NOX4	0.721	8.288e-81
	LINC01638	NOX4	0.642	5.781e-59
	LINC01686	NOX4	0.527	8.933e-37
	LINC01705	NOX4	0.687	1.574e-70
	LINC01711	NOX4	0.648	1.789e-60
	LINC01914	NOX4	0.611	3.676e-52
	LINC01943	NOX4	0.55	1.366e-40
	LINC02126	NOX4	0.54	5.887e-39
	LINC02257	NOX4	0.547	5.462e-40
	LINC02345	NOX4	0.523	4.22e-36
	LINC02519	NOX4	0.557	1.057e-41
	LINC02544	NOX4	0.697	2.073e-73
	LINC02611	NOX4	0.512	1.999e-34
	LNCOG	NOX4	0.599	1.049e-49
	MAGI2-AS3	NOX4	0.611	4.294e-52
	MAP3K4-AS1	NOX4	0.747	1.47e-89
	MIR100HG	NOX4	0.575	5.562e-45
	MIR4435-2HG	NOX4	0.546	6.583e-40
	MMP2-AS1	NOX4	0.52	1.023e-35
	MSC-AS1	NOX4	0.831	3.897e-128
	MYOSLID	NOX4	0.603	1.578e-50
	NR2F1-AS1	NOX4	0.568	1.062e-43
	PCAT19	NOX4	0.519	1.303e-35
	PELATON	NOX4	0.624	7.13e-55
	SUGCT-AS1	NOX4	0.669	1.028e-65
